# Supplementary material for: Chinese Marine Materia Medica Resources: Status and Potential
Source: PubMed Central journal article supplement (PMC4820300; doi:10.3390/md14030046), 2016-03-03
Supplement: marinedrugs-14-00046-s001.pdf [file marinedrugs-14-00046-s001.pdf]

## Supplementary Materials: Chinese Marine *Materia Medica* Resources: Status and Potential

Xiu-Mei Fu, Meng-Qi Zhang, Chang-Lun Shao, Guo-Qiang Li, Hong Bai, Gui-Lin Dai, Qian-Wen Chen, Wei Kong, Xian-Jun Fu and Chang-Yun Wang

The questionnaire of traditional Chinese medicine commodity of “Excavation and Rectification of Marine Traditional Chinese Medicinal Bioresources”

Survey site: Bozhou TCM Market in Anhui Survey time: 6 May 2013

| Drug name                            | Quality grade                                                                         | Storage condition            | Storage time                                                                                           | Processing method |                           |
|--------------------------------------|---------------------------------------------------------------------------------------|------------------------------|--------------------------------------------------------------------------------------------------------|-------------------|---------------------------|
| 1-3-1 <i>Syngnathus</i>              | Unkown                                                                                | Air drying                   | Unkown                                                                                                 | Drying in the sun |                           |
| Original organism                    | Resource status                                                                       | Production area              | Output                                                                                                 | Sales volume      |                           |
| <i>Solegnathus hardwickii</i> (Gray) | <input type="checkbox"/> Cultured<br><input checked="" type="checkbox"/> Wild         | Hainan                       | Unkown                                                                                                 | 500–600 kg/Year   |                           |
| Medicament portion                   | Whole body                                                                            |                              |                                                                                                        |                   |                           |
| Main function                        | Invigorating the kidney and strengthening Yang                                        |                              |                                                                                                        |                   |                           |
| Price (Yuan/kg)                      | 36000                                                                                 | Price tendency               | <input type="checkbox"/> Rise <input checked="" type="checkbox"/> Stable <input type="checkbox"/> Fall |                   |                           |
| Trading periodicity                  | <input checked="" type="checkbox"/> Slack season <input type="checkbox"/> Busy season |                              |                                                                                                        |                   |                           |
| Retailer                             | Chaofeng pharmacy                                                                     | Retailer contact information | 13965783596                                                                                            |                   |                           |
| Usage                                | Chinese patent medicine                                                               | Industrial raw materials     | Foodstuff                                                                                              | Food processing   | Medicinal materials store |
|                                      | √                                                                                     |                              |                                                                                                        |                   | √                         |
| Remark                               | The sales volume in summer is lower than autumn.                                      |                              |                                                                                                        |                   |                           |

Recorder: Mengqi Zhang Verifier: Yunfei Wu Person in charge: Changyun Wang
